# Supplementary material for: Investigation of a novel color tunable long afterglow phosphor KGaGeO4:Bi3+: luminescence properties and mechanism
Source: Royal Society of Chemistry journal article supplement (doi:10.1039/c6tc04012h), 2016-12-24
Supplement: c6tc04012h1.pdf [file c6tc04012h1.pdf]

## Electronic Supplementary Information

# **Investigation on a novel color tunable long afterglow phosphor $\text{KGaGeO}_4\text{:Bi}^{3+}$ : Luminescence Properties and Mechanism**

Wenzhi Sun <sup>a, b</sup>, Ran Pang <sup>a, \*</sup>, Huimin Li <sup>a, b</sup>, Da Li <sup>a</sup>, Lihong Jiang <sup>a</sup>, Su Zhang <sup>a</sup>,  
Jipeng Fu <sup>a, b</sup> and Chengyu Li <sup>a, \*</sup>

<sup>a</sup> State key Laboratory of Rare Earth Resource Utilization, Changchun Institute of Applied Chemistry, Chinese Academy of Sciences, Changchun 130022, P. R. China.

<sup>b</sup> University of Chinese Academy of Sciences, Beijing 100049, P. R. China.

\* Corresponding author: Tel.:+86-0431-85262208

E-mail address: cyli@ciac.ac.cn and pangran@ciac.ac.cn

**Table S1** Selected K-O bond distances in KGGO:0.01Bi<sup>3+</sup> sample

| Bonds      | Distance (Å) | Bonds      | Distance (Å) | Bonds      | Distance (Å) |
|------------|--------------|------------|--------------|------------|--------------|
| K1-O5      | 2.792        | K2-O1      | 2.777        | K3-O2      | 2.750        |
| K1-O12     | 2.467        | K2-O6      | 2.467        | K3-O3      | 2.579        |
| K1-O13     | 2.930        | K2-O8      | 2.597        | K3-O11     | 2.987        |
| K1-O15     | 2.799        | K2-O10     | 2.698        | K3-O14     | 2.635        |
| (average)  | 2.747        | (average)  | 2.635        | (average)  | 2.738        |
| K4-O6 (×3) | 3.289        | K5-O9 (×3) | 2.715        | K6-O1 (×3) | 3.097        |
| K4-O9 (×3) | 3.160        | K5-O15(×3) | 3.113        | K6-O4 (×3) | 2.913        |
| K4-O16(×3) | 2.808        | K5-O16(×3) | 3.109        | K6-O4 (×3) | 3.053        |
| (average)  | 3.086        | (average)  | 2.979        | (average)  | 3.021        |

**Table S2** The CIE coordinates of KGGO:*x*Bi<sup>3+</sup> (*x* = 0.005–0.13) for photoluminescence ( $\lambda_{\text{ex}} = 320$  nm) and afterglow (irradiated by 254 nm UV lamp for 5 min)

| Number | <i>x</i> (Bi <sup>3+</sup> ) / mol | CIE for PL     | CIE for afterglow |
|--------|------------------------------------|----------------|-------------------|
| 1      | 0.005                              | (0.165, 0.348) | (0.163, 0.306)    |
| 2      | 0.01                               | (0.165, 0.324) | (0.161, 0.291)    |
| 3      | 0.02                               | (0.165, 0.353) | (0.160, 0.311)    |
| 4      | 0.03                               | (0.165, 0.349) | (0.159, 0.294)    |
| 5      | 0.04                               | (0.165, 0.347) | (0.159, 0.293)    |
| 6      | 0.05                               | (0.165, 0.338) | (0.161, 0.277)    |
| 7      | 0.06                               | (0.165, 0.331) | (0.161, 0.266)    |
| 8      | 0.07                               | (0.166, 0.308) | (0.162, 0.234)    |

|    |      |                |                |
|----|------|----------------|----------------|
| 9  | 0.08 | (0.165, 0.278) | (0.163, 0.217) |
| 10 | 0.09 | (0.166, 0.262) | (0.163, 0.203) |
| 11 | 0.10 | (0.166, 0.258) | (0.163, 0.200) |
| 12 | 0.11 | (0.166, 0.257) | (0.163, 0.194) |
| 13 | 0.12 | (0.167, 0.256) | (0.164, 0.203) |
| 14 | 0.13 | (0.166, 0.256) | (0.163, 0.200) |

---
